# Supplementary material for: Effects of hydrogen on Au migration and the growth kinetics of Si nanowires
Source: Royal Society of Chemistry journal article supplement (doi:10.1039/c0ce00239a), 2010-10-01
Supplement: c0ce00239a.pdf [file c0ce00239a.pdf]

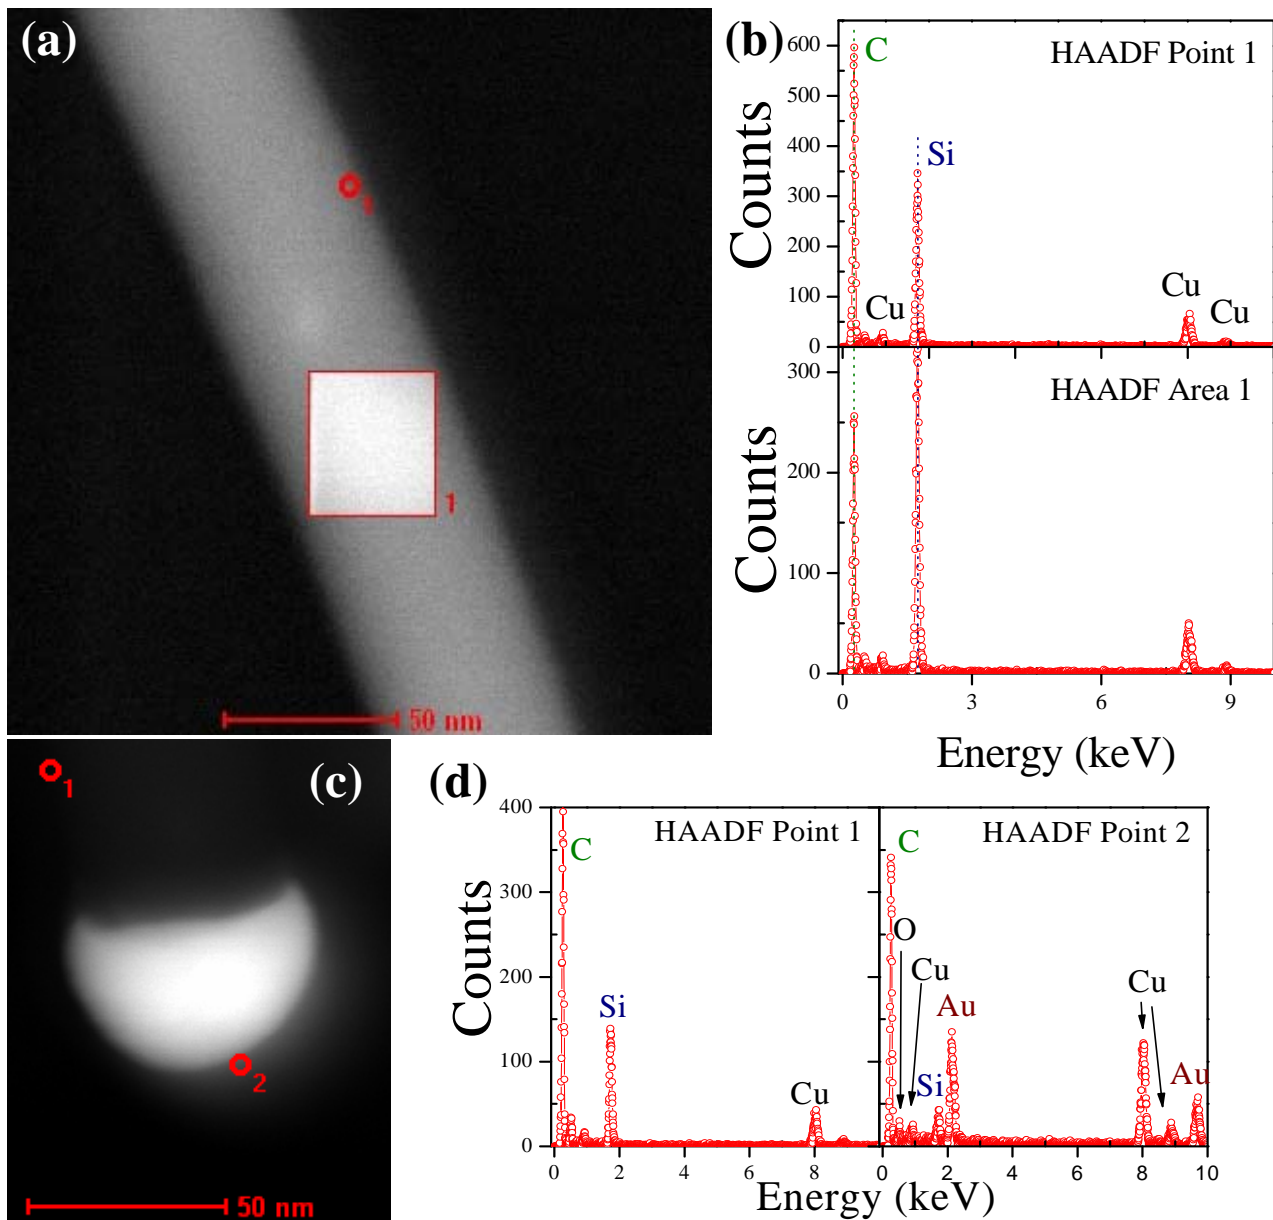

Figure 1. (a), (c) The HAADF images (b), (d) and EDX analysis of SiNWs grown with 10:50 flow rate ratio of  $\text{SiH}_4$  to  $\text{H}_2$ .

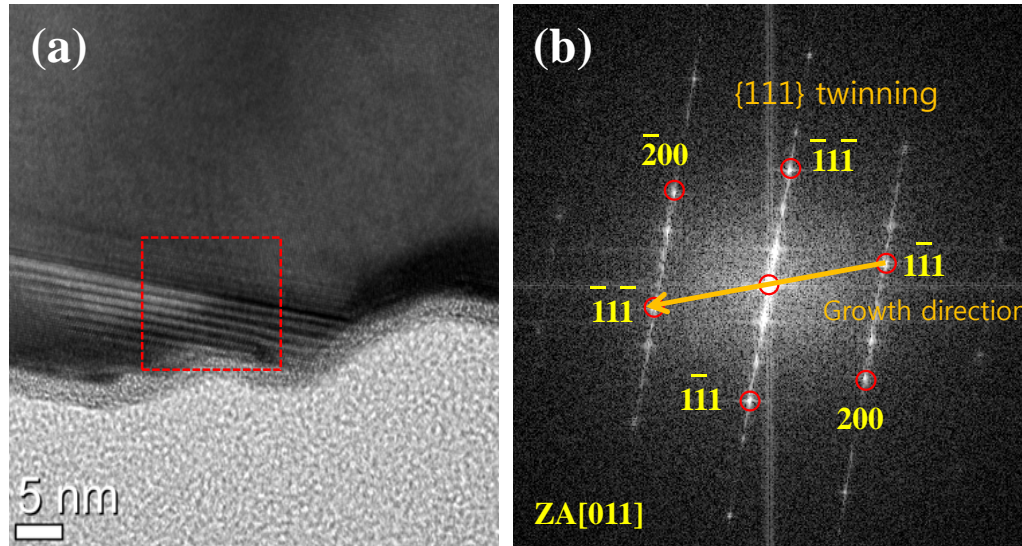

Figure 2. (a) HR-TEM images and (b) FFT image of SiNW grown with 10:200 flow rate ratio of  $\text{SiH}_4$  to  $\text{H}_2$ .
